# Supplementary material for: Nonrestorative Sleep is Associated with Somatic and Depressive Symptoms in Japanese Junior High School Students
Source: Research Square preprint supplement (doi:10.21203/rs.3.rs-6472923/v1), 2025-05-06
Supplement: Supplementary file 1 [file 2e66dad003c3f47af27203b1.docx]

**Supplemental Materials**

Table S1. Sex differences of demographic characteristics, psychosomatic symptoms, and sleep-wake characteristics

|  | Total | Female | Male | *P* value |
| --- | --- | --- | --- | --- |
| n | 392 | 207 | 185 | 0 |
| Grade |  |  |  |  |
| seventh, n (%) | 122 (31.1) | 70 (33.8) | 52 (28.1) | 0.45 |
| eighth, n (%) | 143 (36.5) | 71 (34.3) | 72 (38.9) |  |
| ninth, n (%) | 127 (32.4) | 66 (31.9) | 61 (33.0) |  |
| Electronic devices user, n (%) | 257 (65.6) | 133 (64.3) | 124 (67.0) | 0.60 |
| Last electronic devices usage time |  |  |  |  |
| < 21:00, n (%) | 59 (15.1) | 32 (15.5) | 27 (14.6) | 0.93 |
| 21:00–22:00, n (%) | 76 (19.4) | 42 (20.3) | 34 (18.4) |  |
| 22:00–23:00, n (%) | 128 (32.7) | 65 (31.4) | 63 (34.1) |  |
| ≥ 23:00, n (%) | 129 (32.9) | 68 (32.9) | 61 (33.0) |  |
| Headache, n (%) | 134 (40.0) | 77 (43.0) | 57 (36.5) | 0.26 |
| ≥ 2 days/week, n (%) | 51 (13.0) | 34 (16.4) | 17 (9.2) | 0.04 |
| Abdominal pain, n (%) | 137 (34.9) | 75 (36.2) | 62 (33.5) | 0.60 |
| ≥ 2 days/week, n (%) | 48 (12.2) | 28 (13.5) | 20 (10.8) | 0.44 |
| Appetite loss, n (%) | 78 (19.9) | 46 (22.2) | 32 (17.3) | 0.26 |
| ≥ 2 days/week, n (%) | 31 (7.9) | 23 (11.1) | 8 (4.3) | 0.02 |
| Fatiguability, n (%) | 251 (64.0) | 130 (62.8) | 121 (65.4) | 0.60 |
| ≥ 2 days/week, n (%) | 144 (36.7) | 83 (40.1) | 61 (33.0) | 0.17 |
| Past history of COVID-19, n (%) | 296 (75.5) | 155 (74.9) | 141 (76.2) | 0.81 |
| COVID-19 unvaccinated person, n (%) | 195 (49.7) | 109 (52.7) | 86 (46.5) | 0.08 |
| PHQ-9 score, median (IQR) | 2.0 (0.0, 5.00) | 2.00 (1.0, 6.0) | 2.0 (0.0, 4.0) | 0.009 |
| PHQ-9 score ≥ 5, n (%) | 112 (28.6) | 72 (34.8) | 40 (21.6) | 0.005 |
| GAD-7 score, median (IQR) | 1.0 (0.0, 3.00) | 1.0 (0.0, 3.0) | 1.0 (0.0, 4.0) | 0.20 |
| GAD-7 score ≥ 5, n (%) | 74 (18.9) | 34 (16.4) | 40 (21.6) | 0.20 |
| Loneliness scale score, median (IQR) | 3.0 (3.0, 4.0) | 3.0 (3.0, 4.0) | 3.0 (3.0, 4.0) | 0.97 |
| Loneliness scale score ≥ 6, n (%) | 34 (8.7) | 17 (8.2) | 17 (9.2) | 0.86 |
| LSNS-6 score, median (IQR) | 21.0 (16.0, 25.0) | 21.0 (16.5, 25.0) | 21.0 (16.0, 25.0) | 0.76 |
| LSNS-6 score ≥ 12, n (%) | 40 (10.2) | 22 (10.6) | 18 (9.7) | 0.87 |
| AIS score, median (IQR) | 3.0 (1.0, 5.0) | 3.0 (2.0, 5.0) | 2.0 (1.0, 4.0) | 0.04 |
| AIS score ≥ 6, n (%) | 66 (16.8) | 41 (19.8) | 25 (13.5) | 0.11 |
| Difficulty initiating sleep, n (%) | 185 (47.2) | 105 (50.7) | 80 (43.2) | 0.16 |
| Moderate–severe, n (%) | 39 (9.9) | 26 (12.6) | 13 (7.0) | 0.09 |
| Difficulty maintaining sleep, n (%) | 44 (11.2) | 23 (11.1) | 21 (11.4) | 1 |
| Moderate–severe, n (%) | 3 (0.8) | 2 (1.0) | 1 (0.5) | 1 |
| Early wakening, n (%) | 53 (13.5) | 27 (13.0) | 26 (14.1) | 0.77 |
| Moderate–severe, n (%) | 10 (2.6) | 3 (1.4) | 7 (3.8) | 0.20 |
| Poor sleep quality, n (%) | 150 (38.3) | 81 (39.1) | 69 (37.3) | 0.76 |
| Moderate–severe, n (%) | 14 (3.6) | 10 (4.8) | 4 (2.2) | 0.18 |
| Daytime sleepiness, n (%) | 285 (72.7) | 163 (78.7) | 122 (65.9) | 0.006 |
| Moderate–severe, n (%) | 68 (17.3) | 45 (21.7) | 23 (12.4) | 0.02 |
| RSQ score, median (IQR) | 56.3 (43.8, 71.9) | 53.1 (40.6, 68.8) | 62.5 (43.8, 75.0) | 0.004 |
| RSQ score < 48.5, n (%) | 119 (30.4) | 71 (34.3) | 48 (25.9) | 0.08 |
| Difficulty getting up, n (%) | 92 (23.5) | 52 (25.1) | 40 (21.6) | 0.47 |
| RLS symptoms, n (%) | 62 (15.8) | 32 (15.5) | 30 (16.2) | 0.89 |
| ≥ 2 days/week, n (%) | 30 (7.7) | 13 (6.3) | 17 (9.2) | 0.34 |
| Average sleep duration h, median (IQR) | 8.00 (7.29, 8.57) | 8.00 (7.29, 8.57) | 8.00 (7.29, 8.57) | 0.60 |
| < 7 hours, n (%) | 62 (15.8) | 36 (17.4) | 26 (14.1) | 0.68 |
| 7–8 hours, n (%) | 127 (32.4) | 63 (30.4) | 64 (34.6) |  |
| 8–9 hours, n (%) | 151 (38.5) | 82 (39.6) | 69 (37.3) |  |
| ≥ 9 hours, n (%) | 52 (13.3) | 26 (12.6) | 26 (14.1) |  |
| Ideal sleep duration h, median (IQR) | 9.00 (8.00, 10.00) | 9.00 (8.00, 10.00) | 9.00 (8.00, 10.00) | 0.42 |
| Weekday sleep habits |  |  |  |  |
| Sleep duration h, median (IQR) | 8.00 (7.00, 8.00) | 8.00 (7.00, 8.00) | 8.00 (7.00, 8.00) | 0.11 |
| < 7 hours, n (%) | 145 (37.0) | 88 (42.5) | 57 (30.8) | 0.01 |
| 7–8 hours, n (%) | 41 (10.5) | 13 (6.3) | 28 (15.1) |  |
| 8–9 hours, n (%) | 154 (39.3) | 79 (38.2) | 75 (40.5) |  |
| ≥ 9 hours, n (%) | 52 (13.3) | 27 (13.0) | 25 (13.5) |  |
| Falling asleep time,  h:mm, median (IQR) | 23:00 (22:30, 23:30) | 23:00 (22:30, 23:30) | 23:00 (22:00, 23:15) | 0.004 |
| Last waking up time,  h:mm, median (IQR) | 6:35 (6:30, 7:00) | 6:30 (6:30, 7:00) | 6:45 (6:30, 7:00) | 0.09 |
| Mid-sleep time, h:mm, median (IQR) | 2:45 (2:25, 3:05) | 2:45 (2:30, 3:07) | 2:45 (2:15, 3:00) | 0.09 |
| Weekend sleep habits |  |  |  |  |
| Sleep duration h, median (IQR) | 8.91 (8.00, 10.00) | 9.00 (8.00, 10.00) | 8.50 (8.00, 10.00) | 0.11 |
| < 8 hours, n (%) | 85 (21.7) | 42 (20.3) | 43 (23.2) | 0.20 |
| 8–9 hours, n (%) | 111 (28.3) | 54 (26.1) | 57 (30.8) |  |
| 9–10 hours, n (%) | 146 (37.2) | 78 (37.7) | 68 (36.8) |  |
| ≥ 10 hours, n (%) | 50 (12.8) | 33 (15.9) | 17 (9.2) |  |
| Falling asleep time,  h:mm, median (IQR) | 23:00 (22:40, 0:00) | 23:00 (23:00, 0:00) | 23:00 (22:30, 23:40) | 0.03 |
| Last waking up time,  h:mm, median (IQR) | 8:00 (7:20, 9:00) | 8:30 (7:30, 9:00) | 8:00 (7:00, 9:00) | 0.04 |
| Mid-sleep time, h:mm, median (IQR) | 3:45 (3:09, 4:30) | 3:45 (3:15, 4:30) | 3:30 (3:00, 4:15) | 0.005 |
| Corrected Mid-sleep time,  h:mm, median (IQR) | 3:15 (2:45, 3:51) | 3:17 (2:48, 3:53) | 3:10 (2:42, 3:51) | 0.14 |
| Chronotype |  |  |  |  |
| Morning type | 131 (33.4) | 64 (30.9) | 67 (36.2) | 0.53 |
| Intermediate type | 131 (33.4) | 71 (34.3) | 60 (32.4) |  |
| Evening type | 130 (33.2) | 72 (34.8) | 58 (31.4) |  |
| Weekly sleep loss, h, median (IQR) | 1.43 (0.71, 2.86) | 2.14 (1.43, 2.86) | 1.43 (0.71, 2.86) | 0.001 |
| < 1 hour, n (%) | 221 (56.4) | 100 (48.3) | 121 (65.4) | 0.001 |
| 1–2 hours, n (%) | 118 (30.1) | 69 (33.3) | 49 (26.5) |  |
| ≥ 2 hours, n (%) | 53 (13.5) | 38 (18.4) | 15 (8.1) |  |
| SJL, mm, median (IQR) | 60.0 (30.0, 95.62) | 65.0 (35.0, 97.5) | 52.5 (30.0, 90.0) | 0.03 |

AIS: Athens Insomnia Scale, IQR: Interquartile range, GAD: Generalized Anxiety Disorder, LSNS-6: Lubben Social Network Scale-6, PHQ: Patient Health Questionnaire, RLS: restless legs syndrome, RSQ: Restorative Sleep Questionnaire, SJL: social Jetlag.

Table S2. Grade differences demographic characteristics, psychosomatic symptoms, and sleep-wake characteristics

|  | Seventh grade | Eighth grade | Ninth grade | *P* value |
| --- | --- | --- | --- | --- |
| n | 122 | 143 | 127 |  |
| Male, n (%) | 52 (42.6) | 72 (50.3) | 61 (48.0) | 0.45 |
| Electronic devices user, n (%) | 69 (56.6) | 93 (65.0) | 95 (74.8) | 0.009 |
| Last electronic devices usage time |  |  |  |  |
| < 21:00, n (%) | 26 (21.3) | 19 (13.3) | 14 (11.0) | < 0.001 |
| 21:00–22:00, n (%) | 27 (22.1) | 31 (21.7) | 18 (14.2) |  |
| 22:00–23:00, n (%) | 46 (37.7) | 45 (31.5) | 37 (29.1) |  |
| ≥ 23:00, n (%) | 23 (18.9) | 48 (33.6) | 58 (45.7) |  |
| Headache, n (%) | 40 (32.8) | 49 (34.3) | 45 (64.3) | < 0.001 |
| ≥ 2 days/week, n (%) | 16 (13.1) | 19 (13.3) | 16 (12.6) | 1 |
| Abdominal pain, n (%) | 48 (39.3) | 49 (34.3) | 40 (31.5) | 0.43 |
| ≥ 2 days/week, n (%) | 19 (15.6) | 18 (12.6) | 11 (8.7) | 0.25 |
| Appetite loss, n (%) | 20 (16.4) | 31 (21.7) | 27 (21.3) | 0.52 |
| ≥ 2 days/week, n (%) | 9 (7.4) | 11 (7.7) | 11 (8.7) | 0.95 |
| Fatiguability, n (%) | 75 (61.5) | 89 (62.2) | 87 (68.5) | 0.44 |
| ≥ 2 days/week, n (%) | 52 (42.6) | 39 (27.3) | 53 (41.7) | 0.01 |
| Past history of COVID-19, n (%) | 95 (77.9) | 107 (74.8) | 94 (74.0) | 0.76 |
| COVID-19 unvaccinated person, n (%) | 76 (62.3) | 74 (51.7) | 45 (35.4) | < 0.001 |
| PHQ-9 score, median (IQR) | 2.0 (0.0, 5.0) | 1.0 (0.0, 5.0) | 2.0 (1.0, 5.5) | 0.03 |
| PHQ-9 score ≥ 5, n (%) | 32 (26.2) | 39 (27.3) | 41 (32.3) | 0.54 |
| GAD-7 score, median (IQR) | 3.0 (1.00, 5.75) | 1.0 (0.0, 3.0) | 1.0 (0.0, 2.0) | < 0.001 |
| GAD-7 score ≥ 5, n (%) | 40 (32.8) | 25 (17.5) | 9 (7.1) | < 0.001 |
| Loneliness scale score, median (IQR) | 4.0 (3.00, 5.00) | 3.0 (3.0, 4.0) | 3.0 (3.0, 3.0) | < 0.001 |
| Loneliness scale score ≥ 6, n (%) | 22 (18.0) | 7 (4.9) | 5 (3.9) | < 0.001 |
| LSNS-6 score, median (IQR) | 19.0 (14.0, 24.0) | 21.0 (16.0, 24.0) | 23.0 (19.0, 26.5) | < 0.001 |
| LSNS-6 score ≥ 12, n (%) | 21 (17.2) | 14 (9.8) | 5 (3.9) | 0.002 |
| AIS score, median (IQR) | 3.0 (2.0, 4.8 | 2.0 (1.0, 4.0) | 3.0 (2.0, 5.0) | 0.003 |
| AIS score ≥ 6, n (%) | 22 (18.0) | 16 (11.2) | 28 (22.0) | 0.05 |
| Difficulty initiating sleep, n (%) | 68 (55.7) | 64 (44.8) | 53 (41.7) | 0.07 |
| Moderate–severe, n (%) | 9 (7.4) | 13 (9.1) | 17 (13.4) | 0.28 |
| Difficulty maintaining sleep, n (%) | 21 (17.2) | 7 (4.9) | 16 (12.6) | 0.004 |
| Moderate–severe, n (%) | 2 (1.6) | 0 (0.0) | 1 (0.8) | 0.21 |
| Early wakening, n (%) | 19 (15.6) | 17 (11.9) | 17 (13.4) | 0.68 |
| Moderate–severe, n (%) | 4 (3.3) | 4 (2.8) | 2 (1.6) | 0.73 |
| Poor sleep quality, n (%) | 49 (40.2) | 42 (29.4) | 59 (46.5) | 0.01 |
| Moderate–severe, n (%) | 5 (4.1) | 2 (1.4) | 7 (5.5) | 0.17 |
| Daytime sleepiness, n (%) | 84 (68.9) | 96 (67.1) | 105 (82.7) | 0.007 |
| Moderate–severe, n (%) | 23 (18.9) | 19 (13.3) | 26 (20.5) | 0.26 |
| RSQ score, median (IQR) | 56.3 (43.8, 74.2) | 56.3 (42.2, 75.0) | 56.3 (40.6, 67.2) | 0.14 |
| RSQ score < 48.5, n (%) | 33 (27.0) | 43 (30.1) | 43 (33.9) | 0.52 |
| Difficulty getting up, n (%) | 27 (22.1) | 34 (23.8) | 31 (24.4) | 0.91 |
| RLS symptoms, n (%) | 18 (14.8) | 21 (14.7) | 23 (18.1) | 0.70 |
| ≥ 2 days/week, n (%) | 10 (8.2) | 7 (4.9) | 13 (10.2) | 0.24 |
| Average sleep duration h, median (IQR) | 8.29 (7.69, 8.79) | 8.00 (7.46, 8.61) | 7.57 (7.11, 8.25) | < 0.001 |
| < 7 hours, n (%) | 10 (8.2) | 22 (15.4) | 30 (23.6) | < 0.001 |
| 7–8 hours, n (%) | 33 (27.0) | 43 (30.1) | 51 (40.2) |  |
| 8–9 hours, n (%) | 57 (46.7) | 55 (38.5) | 39 (30.7) |  |
| ≥ 9 hours, n (%) | 22 (18.0) | 23 (16.1) | 7 (5.5) |  |
| Ideal sleep duration h, median (IQR) | 9.00 (8.00, 10.00) | 9.00 (8.00, 10.00) | 8.50 (8.00, 10.00) | 0.19 |
| Weekday sleep habits |  |  |  |  |
| Sleep duration h, median (IQR) | 8.00 (7.00, 8.50) | 8.00 (7.00, 8.50) | 7.00 (6.58, 8.00) | < 0.001 |
| < 7 hours, n (%) | 33 (27.0) | 47 (32.9) | 65 (51.2) | < 0.001 |
| 7–8 hours, n (%) | 12 (9.8) | 12 (8.4) | 17 (13.4) |  |
| 8–9 hours, n (%) | 56 (45.9) | 58 (40.6) | 40 (31.5) |  |
| ≥ 9 hours, n (%) | 21 (17.2) | 26 (18.2) | 5 (3.9) |  |
| Falling asleep time,  h:mm, median (IQR) | 22:30 (22:00, 23:00) | 23:00 (22:10, 23:30) | 23:00 (22:45, 0:00) | < 0.001 |
| Last waking up time,  h:mm, median (IQR) | 6:37 (6:30, 7:00) | 6:30 (6:30, 7:00) | 6:37 (6:30, 7:00) | 0.60 |
| Mid-sleep time, h:mm, median (IQR) | 2:30 (2:17, 3:00) | 2:45 (2:22, 3:00) | 3:00 (2:30, 3:21) | < 0.001 |
| Weekend sleep habits |  |  |  |  |
| Sleep duration h, median (IQR) | 9.00 (8.00, 10.00) | 8.67 (8.00, 10.00) | 8.00 (7.88, 9.00) | 0.005 |
| < 8 hours, n (%) | 22 (18.0) | 31 (21.7) | 32 (25.2) | 0.10 |
| 8–9 hours, n (%) | 26 (21.3) | 41 (28.7) | 44 (34.6) |  |
| 9–10 hours, n (%) | 54 (44.3) | 54 (37.8) | 38 (29.9) |  |
| ≥ 10 hours, n (%) | 20 (16.4) | 17 (11.9) | 13 (10.2) |  |
| Falling asleep time,  h:mm, median (IQR) | 23:00 (22:22, 23:30) | 23:00 (23:00, 0:00) | 23:10 (23:00, 0:00)  (*continued*) | < 0.001 |
| Last waking up time,  h:mm, median (IQR) | 8:00 (7:30, 9:00) | 8:00 (7:00, 9:00) | 8:00 (7:27, 9:00) | 0.97 |
| Mid-sleep time, h:mm, median (IQR) | 3:30 (3:00, 4:00) | 3:45 (3:15, 4:30) | 3:45 (3:15, 4:30) | 0.04 |
| Corrected Mid-sleep time,  h:mm, median (IQR) | 3:04 (2:33, 3:38) | 3:21 (2:53, 3:58) | 3:15 (2:53, 3:55) | 0.01 |
| Chronotype |  |  |  |  |
| Morning type | 54 (44.3) | 39 (27.3) | 38 (29.9) | 0.04 |
| Intermediate type | 36 (29.5) | 50 (35.0) | 45 (35.4) |  |
| Evening type | 32 (26.2) | 54 (37.8) | 44 (34.6) |  |
| Weekly sleep loss, h, median (IQR) | 1.43 (1.43, 2.86) | 1.43 (0.71, 2.86) | 1.43 (0.71, 2.86) | 0.87 |
| < 1 hour, n (%) | 65 (53.3) | 80 (55.9) | 76 (59.8) | 0.20 |
| 1–2 hours, n (%) | 42 (34.4) | 47 (32.9) | 29 (22.8) |  |
| ≥ 2 hours, n (%) | 15 (12.3) | 16 (11.2) | 22 (17.3) |  |
| SJL, mm, median (IQR) | 60.0 (36.3, 86.3) | 60.0 (30.0, 105.0) | 52.5 (30.0, 90.0) | 0.32 |

AIS: Athens Insomnia Scale, IQR: Interquartile range, GAD: Generalized Anxiety Disorder, LSNS-6: Lubben Social Network Scale-6, PHQ: Patient Health Questionnaire, RLS: restless legs syndrome, RSQ: Restorative Sleep Questionnaire, SJL: social Jetlag.
